# Supplementary material for: Stable Zinc-Based Metal-Organic Framework Photocatalyst for Effective Visible-Light-Driven Hydrogen Production
Source: MDPI journal article supplement (doi:10.3390/molecules27061917), 2022-03-16
Supplement: s1 [file s1]

**Supporting information for**

**Stable Zinc-Based Metal-Organic Framework Photocatalyst for**

**Effective Visible-Light-Driven Hydrogen Production**

**Li-Long Dang <sup>1,3</sup>, Ting-Ting Zhang <sup>1,2</sup>, Ting-Ting Li <sup>1</sup>, Tian Chen <sup>1</sup>, Ying Zhao <sup>1</sup>,  
Chen-Chen Zhao <sup>1</sup> and Lu-Fang Ma <sup>1,\*</sup>**

- <sup>1</sup> Henan Province Function-Oriented Porous Materials Key Laboratory,  
College of Chemistry and Chemical Engineering, Luoyang Normal  
University, Luoyang 471934, China; danglilong8@163.com (L.-L.D.);  
zhangtingting131@126.com (T.-T.Z.); tingtinglichem@163.com (T.-T.L.);  
ctian2022@163.com (T.C.);  
zhaoyingchem@126.com (Y.Z.); chenchenzhao2022@163.com (C.-C.Z.)
- <sup>2</sup> College of Materials and Chemical Engineering, China Three Gorges  
University, Yichang 443002, China
- <sup>3</sup> Shanghai Key Laboratory of Molecular Catalysis and Innovative Materials,  
Fudan University,  
Shanghai 200438, China
- \* Correspondence: mazhuxp@126.com

## **A. Experimental Section**

### **1. Materials and Methods**

## **B. Supporting Figures**

Figure S1. PXRD patterns of simulated (Red) and after photocatalytic test in H<sub>2</sub>O (Black) of 1.

Figure S2. PXRD patterns of simulated (yellow) and after being immersed samples under H<sub>2</sub>O solvent or different mixed solutions of H<sub>2</sub>O and DMF of 1.

Figure S3. PXRD patterns of simulated (Black) and after photocatalytic test in a ratio 6:4 of H<sub>2</sub>O and DMF (Blue) of 1.

Figure S4. The fluorescence emission spectra before and after the photocatalytic reaction of 1 in aqueous solution.

Figure S5. XPS results of 1 (as synthesized)

Figure S6. XPS results of 1 (after photocatalytic reaction)

Figure S7. The Tauc's plot ( $\alpha h\nu$ )<sup>1/2</sup> vs ( $h\nu$ ), where  $\alpha$  is absorbance

## **C. Supporting Tables**

Table S1. Photocatalytic activity of some typical MOF-based photocatalysts for the hydrogen evolution reaction.

Table S2. Crystal data and structure refinement for complex 1

## **D. Supporting References**

## A. Experimental Section

### 1. Materials and Methods

Analytically pure  $\text{Zn}(\text{NO}_3)_2 \cdot 6\text{H}_2\text{O}$ , 4, 4'-bibenzoic acid-2, 2'-sulfone (**L1**), 4,4'-azopyridine (**L2**) and  $\text{Na}_2\text{S}$ ,  $\text{Na}_2\text{SO}_3$ ,  $\text{Na}_2\text{SO}_4$  were purchased from drug companies and used without further purification process. In addition, the Infrared spectra (IR) were performed on the Nicolet 170SX spectrometer in the  $4000\text{--}400\text{ cm}^{-1}$ . Meanwhile, the Elemental analyses tests of C, H, N were performed carefully on an instrument of the model 2400 Perkin-Elmer analyser. A series of PXRD experiments were carried out on a Bruker D8-ADVANCE X-ray diffractometer with Cu  $K\alpha$  radiation ( $\lambda = 1.5418\text{ \AA}$ ). Measurements were made in a  $2\theta$  range of  $5\text{--}50^\circ$  at room temperature with a step of  $0.02^\circ$  ( $2\theta$ ) and a counting time of 0.2 s/step, and the operating power was 40 KV, 40 mA. Thermogravimetric analysis (TGA) experiments were executed utilizing SII EXSTAR6000 TG/DTA6300 thermal analyzer from 25 to  $800^\circ\text{C}$  under a nitrogen atmosphere as well as a heating rate of  $10^\circ\text{C min}^{-1}$ . Photoelectric measurements were acquired with a CHI 660E electrochemical workstation, the working area of working electrode is  $1.0\text{ cm}^2$ , and the MOF modified by ITO. Moreover, the Ag/AgCl was used as a reference electrode and platinum wire electrode as a counter electrode. All electrochemical tests were performed at room temperature in 0.5 M  $\text{Na}_2\text{SO}_4$  solution.

## B. Supporting Figures

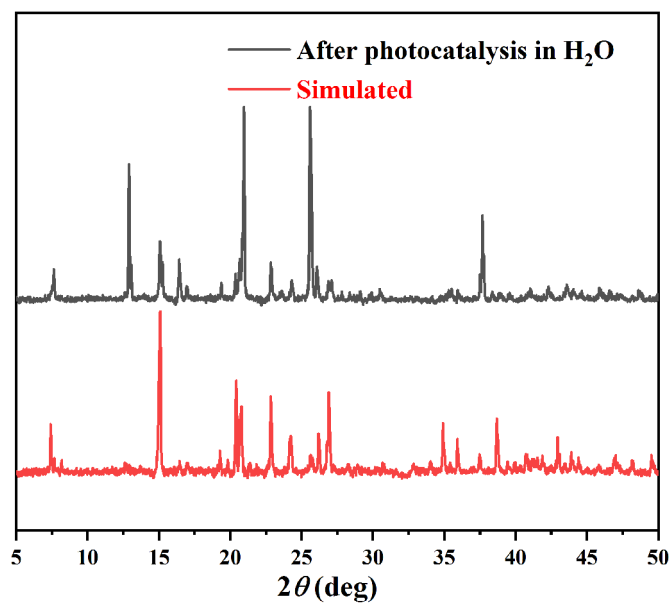

**Figure S1.** PXRD patterns of simulated (Red) and after photocatalytic test in H<sub>2</sub>O (Black) of **1**.

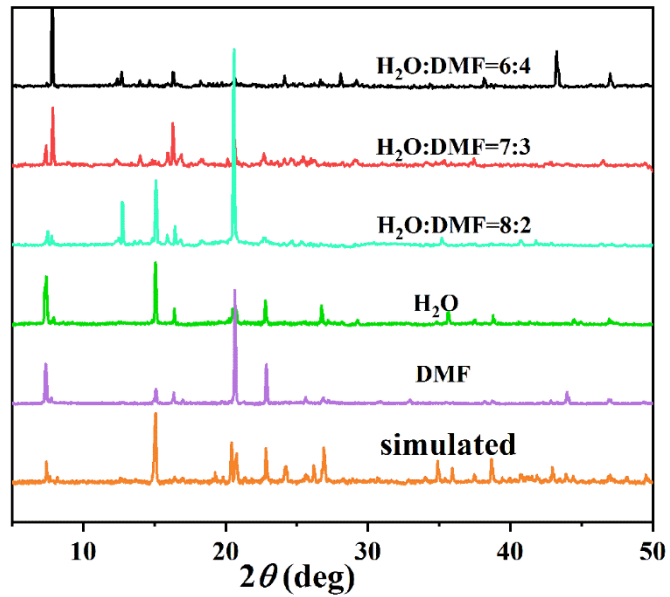

**Figure S2.** PXRD patterns of simulated (yellow) and after being immersed samples under H<sub>2</sub>O solvent or different mixed solutions of H<sub>2</sub>O and DMF of **1**.

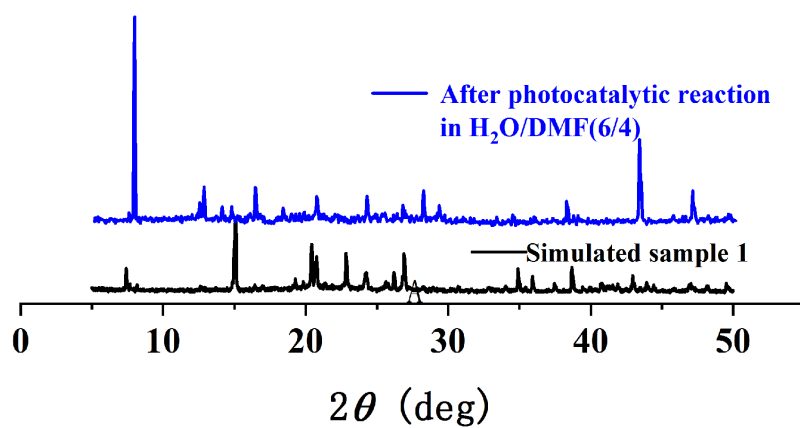

**Figure S3.** PXRD patterns of simulated (Black) and after photocatalytic test in a ratio 6:4 of H<sub>2</sub>O and DMF (Blue) of **1**.

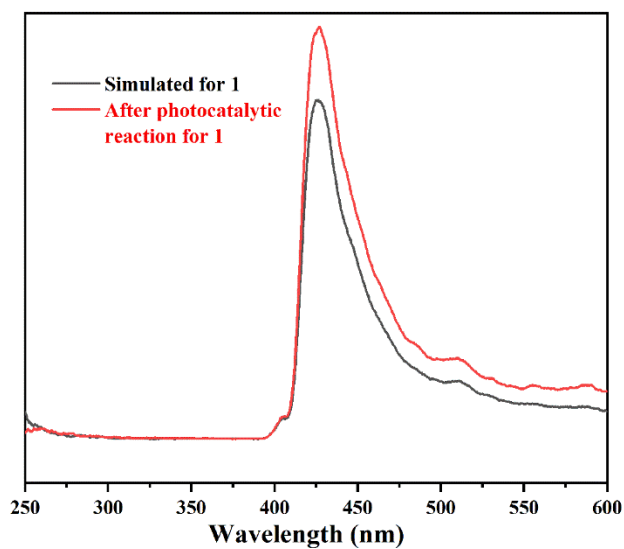

**Figure S4.** The fluorescence emission spectra before and after the photocatalytic reaction of **1** in aqueous solution.

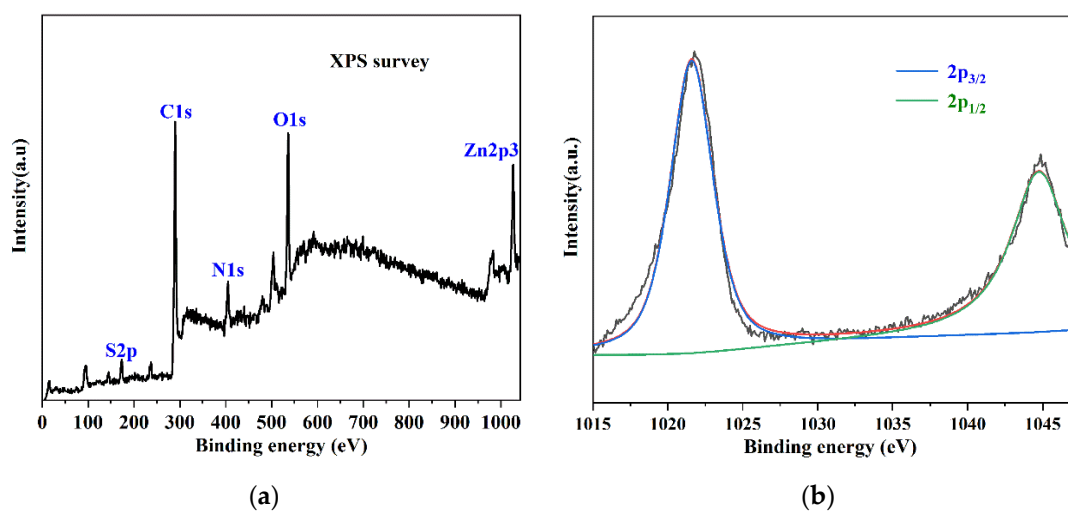

**Figure S5.** XPS results of **1** (as synthesized), including (a) complete and (b) Zn 2p spectra.

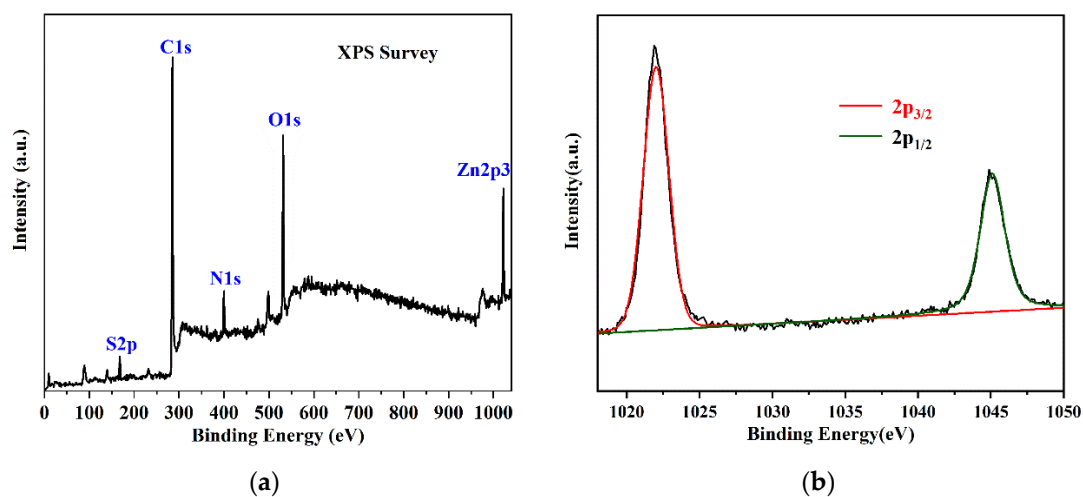

**Figure S6.** XPS results of **1** (after photocatalytic reaction), including (a) complete and (b) Zn 2p spectra.

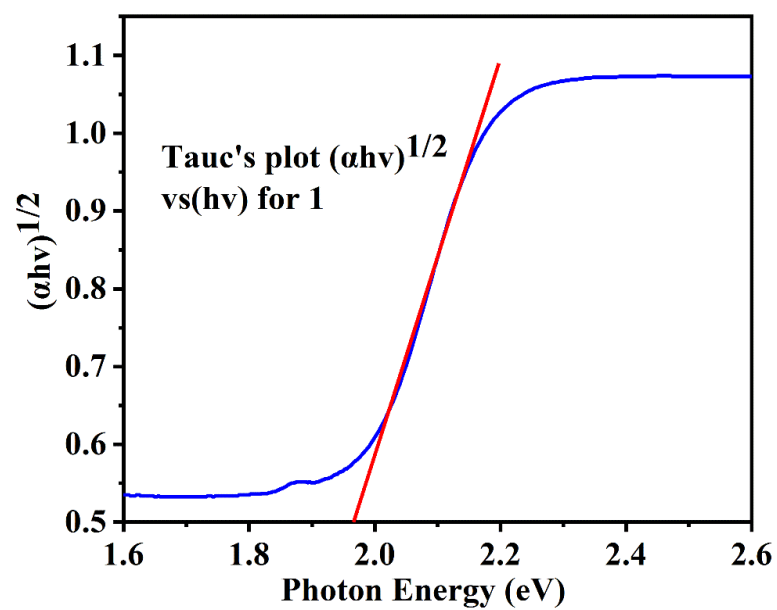

**Figure S7.** The Tauc's plot  $(\alpha h\nu)^{1/2}$  vs  $(h\nu)$ , where  $\alpha$  is absorbance based on solid-state UV-Vis absorption in Figure 4a.

## C. Supporting Tables

**Table S1. Photocatalytic activity of some typical MOF-based photocatalysts for the hydrogen evolution reaction.**

| Photocatalyst                                             | Sacrificial reagent                                | Production rate ( $\mu\text{mol h}^{-1} \text{g}^{-1}$ ) | Ref.      |
|-----------------------------------------------------------|----------------------------------------------------|----------------------------------------------------------|-----------|
| Ti-MOF                                                    | Triethanolamine (TEOA)                             | 0                                                        | [1]       |
| Ti-MOF-NH <sub>2</sub>                                    | Triethanolamine (TEOA)                             | $\approx 170$                                            | [1]       |
| 0.5 wt.% Pt/Ti-MOF-NH <sub>2</sub>                        | Triethanolamine (TEOA)                             | $\approx 330$                                            | [1]       |
| 1.5wt.%Pt/Ti-MOF-NH <sub>2</sub>                          | Triethanolamine (TEOA)                             | $\approx 500$                                            | [1]       |
| 2 wt.% Pt/Ti-MOF-NH <sub>2</sub>                          | Triethanolamine (TEOA)                             | $\approx 460$                                            | [1]       |
| Small-sized Ni NPs anchored in MOF-5                      | Triethanolamine (TEOA)                             | 3,022                                                    | [2]       |
| Ni@MOF-5                                                  | Triethanolamine (TEOA)                             | 30220                                                    | [2]       |
| Pt complex immobilized MOF-253                            | CH <sub>3</sub> CN                                 | $\approx 58,000$                                         | [3]       |
| UiO-66                                                    | Na <sub>2</sub> S, Na <sub>2</sub> SO <sub>3</sub> | 0                                                        | [4]       |
| UiO-66/CdS                                                | Na <sub>2</sub> S, Na <sub>2</sub> SO <sub>3</sub> | 1,700                                                    | [4]       |
| ErB dye-sensitized Pt/UiO-66 octahedrons                  | Methanol                                           | 460                                                      | [5]       |
| Ti-MOF-Ru(tpy) <sub>2</sub>                               | Triethanolamine (TEOA)                             | $\approx 200$                                            | [6]       |
| Pt@UiO-66                                                 | Triethanolamine (TEOA)                             | 3.9                                                      | [7]       |
| Co-MOF                                                    | Triethanolamine (TEOA)                             | 1102                                                     | [8]       |
| Cu <sub>2</sub> I <sub>2</sub> -based MOF                 | Triethanolamine (TEA)                              | 7090                                                     | [9]       |
| NiS/Zn <sub>0.5</sub> Cd <sub>0.5</sub> S                 | Na <sub>2</sub> S, Na <sub>2</sub> SO <sub>3</sub> | 16780                                                    | [10]      |
| Pt@NH <sub>2</sub> -UiO-66                                | Triethanolamine (TEOA)                             | 257.38                                                   | [11]      |
| UCNPs-Pt@MOF/Au                                           | Triethanolamine (TEOA)                             | 280                                                      | [12]      |
| Al-TCPP-Pt                                                | Triethanolamine (TEOA)                             | 129                                                      | [13]      |
| MIL-101(Cr)@Co                                            | Triethanolamine (TEOA)                             | 1500                                                     | [14]      |
| Ru-TBP-Zn                                                 | Triethanolamine (TEOA)                             | 240                                                      | [15]      |
| PCN-415-NH <sub>2</sub>                                   | Triethanolamine (TEOA)                             | 594                                                      | [16]      |
| [Cu <sub>2</sub> I <sub>2</sub> (BPEA)](DMF) <sub>4</sub> | Triethanolamine (TEA)                              | 4220                                                     | [17]      |
| Zn-MOF                                                    | Na <sub>2</sub> S, Na <sub>2</sub> SO <sub>3</sub> | 743                                                      | This work |



**Table S2. Crystal data and structure refinement for complex 1**

|                                   |                                                                   |                                |
|-----------------------------------|-------------------------------------------------------------------|--------------------------------|
| Empirical formula                 | $\text{C}_{24}\text{H}_{14}\text{N}_4\text{O}_6\text{SZn}$        |                                |
| Formula weight                    | 551.82                                                            |                                |
| Temperature                       | 275.57 K                                                          |                                |
| Wavelength                        | 1.34138 Å                                                         |                                |
| Crystal system                    | Monoclinic                                                        |                                |
| Space group                       | $Cc$                                                              |                                |
| Unit cell dimensions              | $a = 14.7101(6)$ Å                                                | $\alpha = 90^\circ$ .          |
|                                   | $b = 21.8583(9)$ Å                                                | $\beta = 111.9830(10)^\circ$ . |
|                                   | $c = 7.4882(3)$ Å                                                 | $\gamma = 90^\circ$ .          |
| Volume                            | $2232.68(16)$ Å <sup>3</sup>                                      |                                |
| Z                                 | 4                                                                 |                                |
| Density (calculated)              | $1.642$ Mg/m <sup>3</sup>                                         |                                |
| Absorption coefficient            | $1.799$ mm <sup>-1</sup>                                          |                                |
| F(000)                            | 1120.0                                                            |                                |
| Crystal size                      | $0.15 \times 0.12 \times 0.11$ mm <sup>3</sup>                    |                                |
| Radiation                         | GaK $\alpha$ ( $\lambda = 1.34138$ )                              |                                |
| Theta range for data collection   | $6.646$ to $146.656^\circ$ .                                      |                                |
| Index ranges                      | $-21 \leq h \leq 21$ , $-31 \leq k \leq 31$ , $-10 \leq l \leq 8$ |                                |
| Reflections collected             | 16215                                                             |                                |
| Independent reflections           | 5719 [R(int) = 0.0437]                                            |                                |
| Max. and min. transmission        | 0.751 and 0.421                                                   |                                |
| Refinement method                 | Full-matrix least-squares on F <sup>2</sup>                       |                                |
| Data / restraints / parameters    | 5719/2/325                                                        |                                |
| Goodness-of-fit on F <sup>2</sup> | 1.088                                                             |                                |
| Final R indices [I > 2sigma(I)]   | R1 = 0.0423, wR2 = 0.1131                                         |                                |
| R indices (all data)              | R1 = 0.0436, wR2 = 0.1190                                         |                                |
| Largest diff. peak and hole       | 1.01 and -0.50 e.Å <sup>-3</sup>                                  |                                |

## D. Supporting References

1. Toyao, T.; Saito, M.; Horiuchi, Y.; Mochizuki, K.; Iwata, M.; Higashimura, H.; Matsuoka, M. Efficient hydrogen production and photocatalytic reduction of nitrobenzene over a visible-light-responsive metal–organic framework photocatalyst. *Catal. Sci. Technol.* **2013**, *3*, 2092–2097.
2. Zhen, W.; Ma, J.T.; Lu, G.X. Small-sized Ni (1 1 1) particles in metal-organic frameworks with low overpotential for visible photocatalytic hydrogen generation. *Appl. Catal. B Environ.* **2016**, *190*, 12–25.
3. Zhou, T.; Du, Y.; Borgna, A.; Hong, J.; Wang, Y.; Han, J.; Zhang, W.; Xu, R. Post-synthesis modification of a metal–organic framework to construct a bifunctional photocatalyst for hydrogen production. *Energy Environ. Sci.* **2013**, *6*, 3229–3234.
4. Lin, R.; Shen, L.; Ren, Z.; Wu, W.; Tan, Y.; Fu, H.; Zhang, J.; Wu, L. Enhanced photocatalytic hydrogen production activity via dual modification of MOF and reduced graphene oxide on CdS. *Chem. Commun.* **2014**, *50*, 8533–8535.
5. Yuan, Y.; Yin, L.; Cao, S.; Xu, G.; Li, C.; Xue, C. Improving photocatalytic hydrogen production of metal–organic framework UiO-66 octahedrons by dye-sensitization. *Appl. Catal. B: Environ.* **2015**, *572*, 168–169.
6. Toyao, T.; Saito, M.; Dohshi, S.; Mochizuki, K.; Iwata, M.; Higashimura, H.; Horiuchi, Y.; Matsuoka, Y. Development of a Ru complex-incorporated MOF photocatalyst for hydrogen production under visible-light irradiation. *Chem. Commun.* **2014**, *50*, 6779–6781.
7. He, J.; Wang, J.; Chen, Y.; Zhang, J.; Duan, D.; Wang, Y.; Yan, Z. A dye-sensitized Pt@UiO-66(Zr) metal–organic framework for visible-light photocatalytic hydrogen production. *Chem. Commun.* **2014**, *50*, 7063–7066.
8. Liao, W.; Zhang, J.; Wang, Z.; Lu, Y.; Yin, S.; Wang, H.; Fan, Y.; Pan, M.; Su, C. Semiconductive Amine-Functionalized Co (II)-MOF for Visible-Light-Driven Hydrogen Evolution and CO<sub>2</sub> Reduction. *Inorg. Chem.* **2018**, *57*, 11436–11442.
9. Shi, D.; Zheng, R.; Sun, M.; Cao, X.; Sun, C.; Cui, C.; Liu, C.; Zhao, J.; Du, M. Semiconductive Copper (I)-Organic Frameworks for Efficient Light-Driven Hydrogen Generation Without Additional Photosensitizers and Cocatalysts. *Angew. Chem. Int. Ed.* **2017**, *56*, 14637–14641.
10. Zhao, X.; Feng, J.; Liu, J.; Shi, W.; Yang, G.; Wang, G.; Cheng, P. An Efficient, Visible-Light-Driven, Hydrogen Evolution Catalyst NiS/ZnxCd<sub>1-x</sub>S Nanocrystal Derived from a Metal-Organic Framework. *Angew. Chem. Int. Ed.* **2018**, *26*, 9790–9794.
11. Xiao, J.; Shang, Q.; Xiong, Y.; Zhang, Q.; Luo, Y.; Yu, S.H.; Jiang, H.L. Boosting Photocatalytic Hydrogen Production of a Metal–Organic Framework Decorated with Platinum Nanoparticles: The Platinum Location Matters. *Angew. Chem. Int. Ed.* **2016**, *55*, 9389–9393.
12. Li, D.; Yu, S.; Jiang, H. From UV to Near-Infrared Light-Responsive Metal–Organic Framework Composites: Plasmon and Upconversion Enhanced Photocatalysis. *Adv. Mater.* **2018**, *30*, 1707377.
13. Fang, X.; Shang, Q.; Wang, Y.; Jiao, L.; Yao, T.; Li, Y.; Zhang, Q.; Luo, Y.; Jiang, H. Single Pt Atoms Confined into a Metal–Organic Framework for Efficient Photocatalysis. *Adv. Mater.* **2018**, *30*, 1705112.
14. Li, Z.; Xiao, J.; Jiang, H. Encapsulating a Co(II) Molecular Photocatalyst in Metal–Organic Framework for Visible-Light-Driven H<sub>2</sub> Production: Boosting Catalytic Efficiency via Spatial Charge Separation. *ACS Catal.* **2016**, *6*, 5359–5365.
15. Lan, G.; Zhu, Y.; Veroneau, S.; Xu, Z.; Micheroni, D.; Lin, W. Electron Injection from Photoexcited Metal–Organic Framework Ligands to Ru<sup>2+</sup> Secondary Building Units for Visible-Light-Driven Hydrogen Evolution. *J. Am. Chem. Soc.* **2018**, *140*, 5326–5329.
16. Yuan, S.; Qin, J.; Xu, H.; Su, J.; Rossi, D.; Chen, Y.; Zhang, L.; Lollar, C.; Wang, Q.; Jiang, H.; Son, D.; Xu, H.; Huang, Z.; Zou, X.; Zhou, H. [Ti<sub>8</sub>Zr<sub>2</sub>O<sub>12</sub>(COO)<sub>16</sub>] Cluster: An Ideal Inorganic Building Unit for Photoactive Metal–Organic Frameworks. *ACS Cent. Sci.* **2018**, *4*, 105–111.

17. Shi, D.; Zheng, R.; Sun, M.; Cao, X.; Sun, C.; Cui, C.; Liu, C.; Zhao, J.; Du, M. Semiconductive Copper (I)-Organic Frameworks for Efficient Light-Driven Hydrogen Generation Without Additional Photosensitizers and Cocatalysts. *Angew. Chem. Int. Ed.* **2017**, *56*, 14637–14641.
